# Supplementary material for: Imaging intraorganellar Ca2+ at subcellular resolution using CEPIA
Source: PubMed Central journal article supplement — Nat Commun. 2014 Jun 13;5:4153. doi: 10.1038/ncomms5153 (PMC4082642; doi:10.1038/ncomms5153), 2014-06-13
Supplement: ncomms5153-s1.pdf [file ncomms5153-s1.pdf]

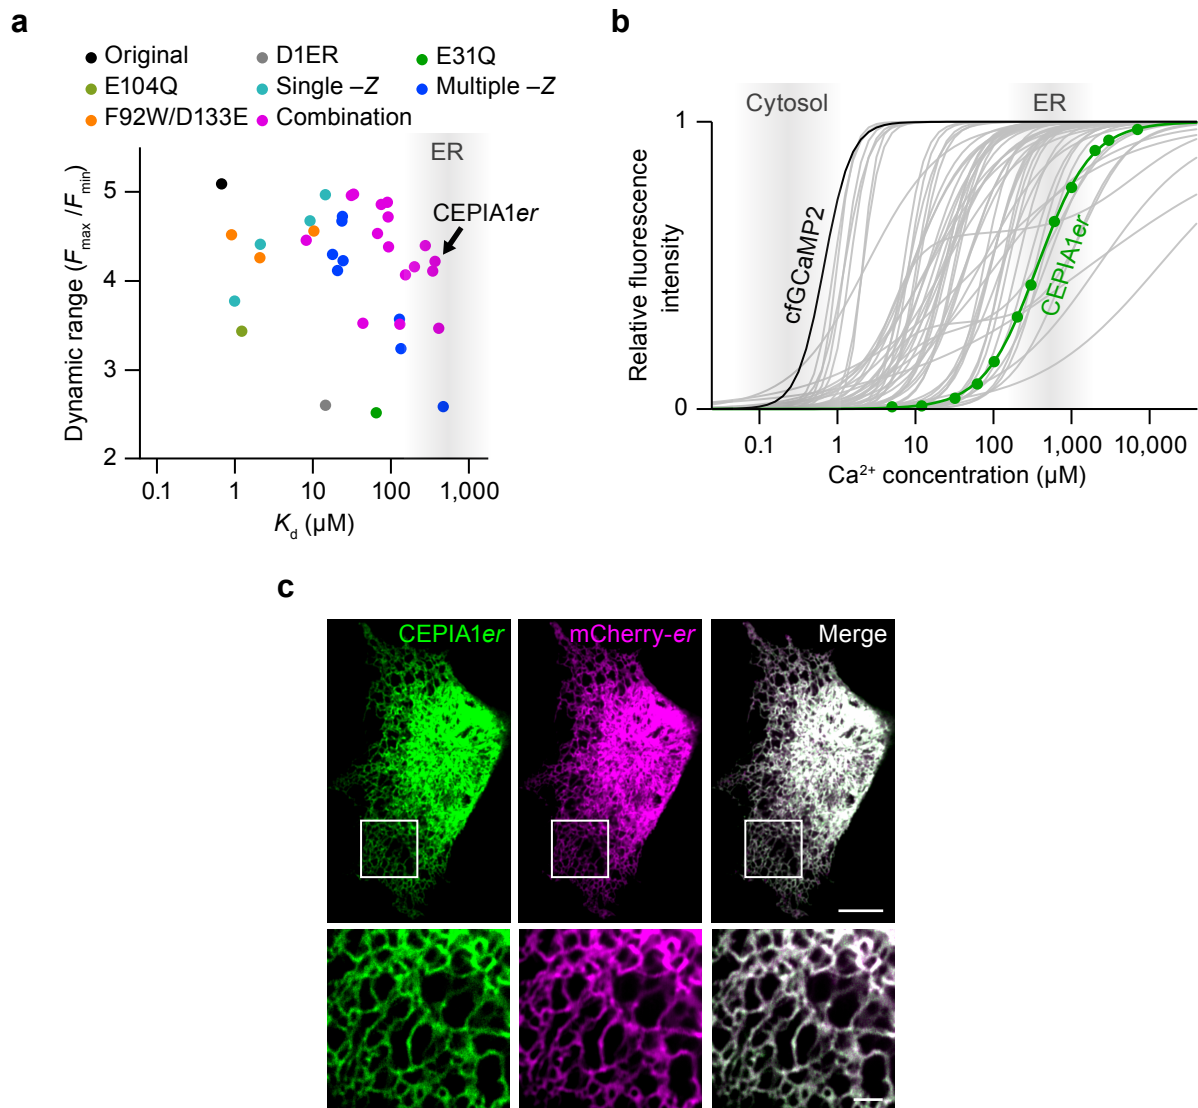

### Supplementary Figure 1. Construction of CEPIA1er.

- (a) Scatter chart of cfGCaMP2 variants with respect to Ca<sup>2+</sup> affinity ( $K_d$ ) and dynamic range ( $F_{\max}/F_{\min}$ ). Introduced amino acid substitutions are categorized by color: original cfGCaMP2 (black), substitutions of previously reported ER Ca<sup>2+</sup> indicators (gray, green and light green), a substitution at single -Z position (cyan), substitutions in multiple -Z positions (blue), substitutions at F92W and/or D133E (orange), combinational substitutions at -Z positions and F92W/D133E (magenta). Data point for CEPIA1er is indicated by an arrow. Putative range of Ca<sup>2+</sup> concentration in the ER is indicated (gray box).
- (b) *In vitro* Ca<sup>2+</sup> titration curves of the recombinant proteins of the original cfGCaMP2 (black) and its variants (gray or green,  $n = 58$ ). For clarity, only the fitted Hill plot curves are shown except for CEPIA1er, for which data points are also shown. Putative ranges of Ca<sup>2+</sup> concentration in the cytosol and ER are indicated (gray boxes).
- (c) Subcellular distribution of CEPIA1er and ER-targeted mCherry (with calreticulin signal sequence) in a HeLa cell. Note that the ER-signal sequence in CEPIA1er is different from that of mCherry-er. The images within the white boxes were expanded. Scale bars, 10  $\mu\text{m}$  (upper) and 2  $\mu\text{m}$  (lower).

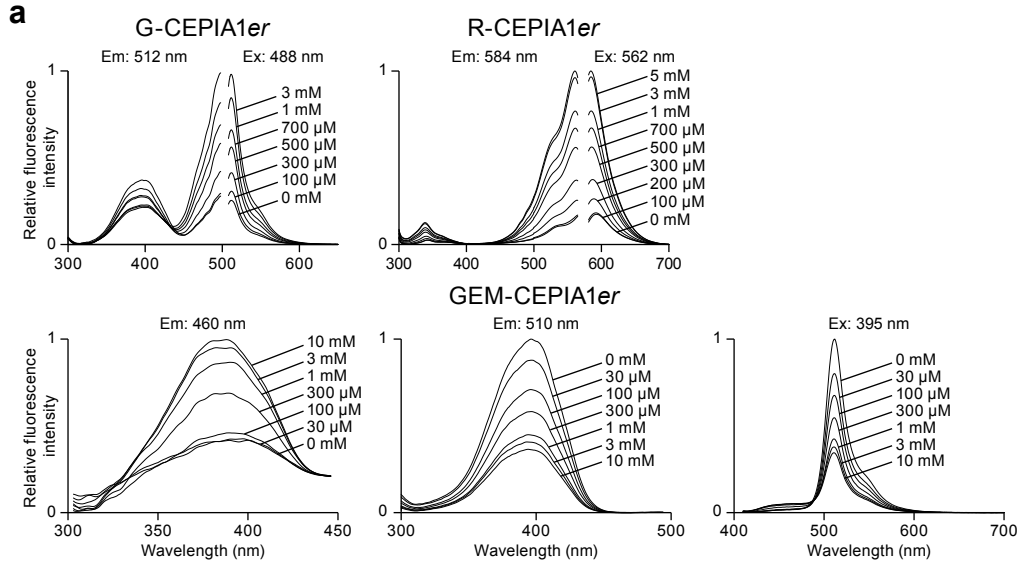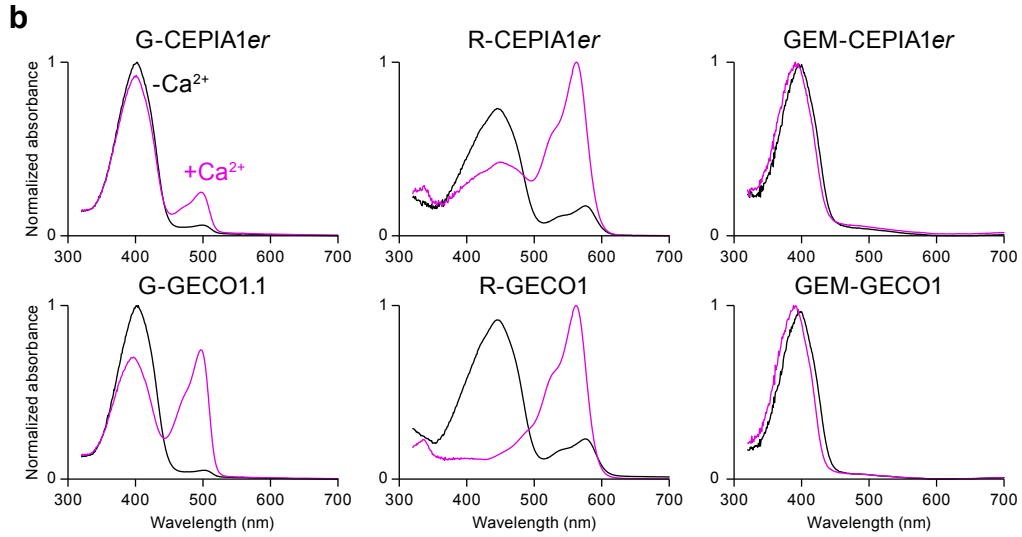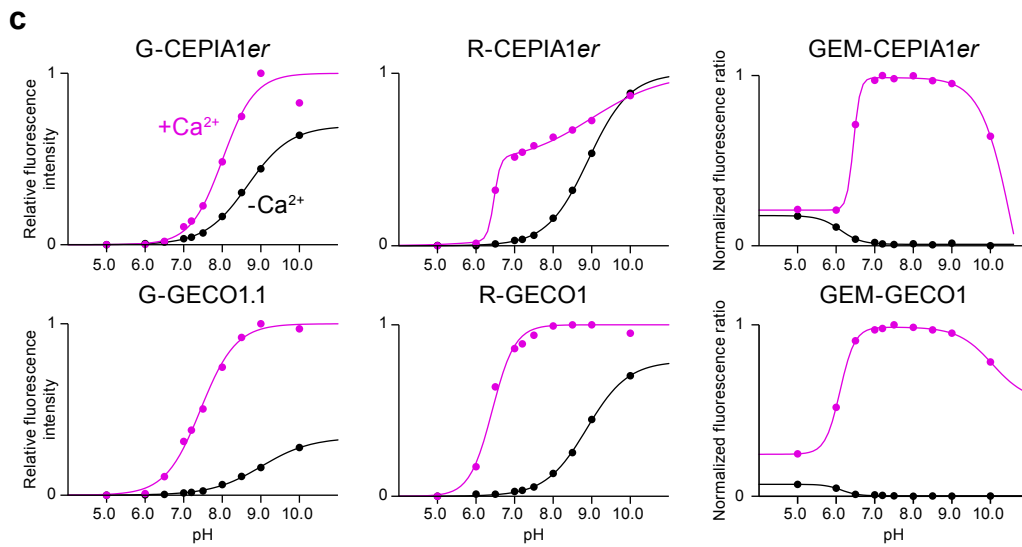

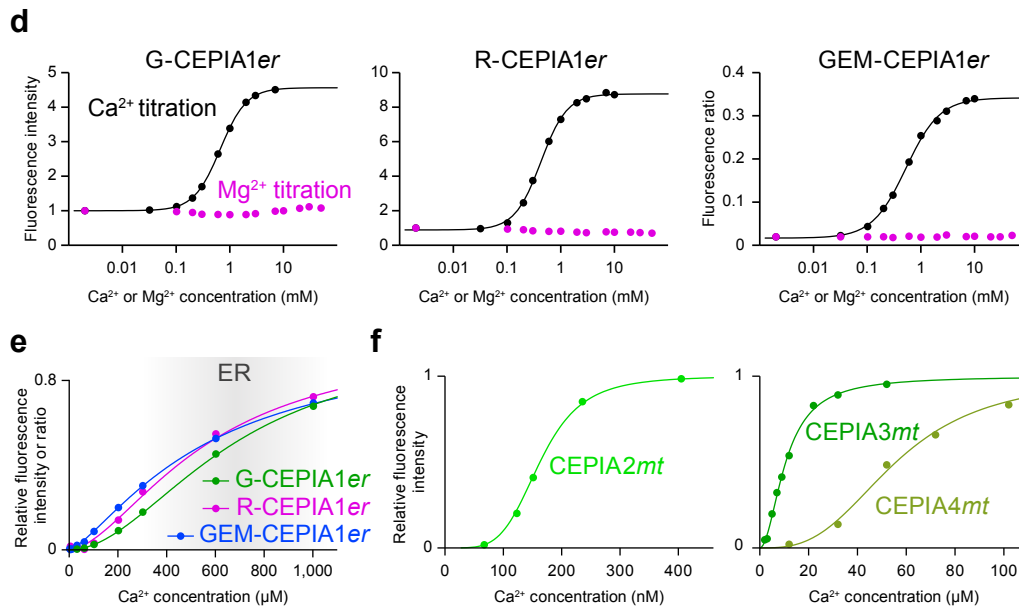

### Supplementary Figure 2. *In vitro* properties of CEPIA.

(a) Spectral titration curves of CEPIA<sub>er</sub> at various Ca<sup>2+</sup> concentrations. Fluorescence intensity change was normalized by the maximum intensity. For emission spectra, G-CEPIA1<sub>er</sub>, R-CEPIA1<sub>er</sub> and GEM-CEPIA1<sub>er</sub> were excited at 488, 562 and 395 nm, respectively. For excitation spectra, fluorescence intensity at 512 and 584 nm were obtained for G-CEPIA1<sub>er</sub> and R-CEPIA1<sub>er</sub>, respectively, and at 460 and 510 nm for GEM-CEPIA1<sub>er</sub>.

(b) Absorbance spectra of CEPIA<sub>er</sub> (upper panels) and original GECCO (lower panels) in Ca<sup>2+</sup>-containing (5 mM, magenta) or Ca<sup>2+</sup>-free (1 mM EGTA, black) solution.

(c) pH titration curves of CEPIA<sub>er</sub>. The fluorescence intensity or ratio was normalized within the maximum and minimum values. pK<sub>a</sub> was evaluated by the pH titration in Ca<sup>2+</sup>-containing (magenta) or Ca<sup>2+</sup>-free (black) solution. The plots of G-CEPIA1<sub>er</sub>, G-GECCO1.1 and R-GECCO1 were fitted by a single Hill plot equation. The plots of R-CEPIA1<sub>er</sub>, GEM-CEPIA1<sub>er</sub>, and GEM-GECCO1 were fitted by a double Hill plot equation. All the extracted parameters are summarized in Table 1.

(d) Mg<sup>2+</sup> titration curves of CEPIA<sub>er</sub> (magenta) compared with Ca<sup>2+</sup> titration curves (black). The fluorescence intensity was normalized within the values in Mg<sup>2+</sup> and Ca<sup>2+</sup> free solution.

(e) Ca<sup>2+</sup> titration of G-CEPIA1<sub>er</sub> (green), R-CEPIA1<sub>er</sub> (magenta) and GEM-CEPIA1<sub>er</sub> (blue) plotted against linear [Ca<sup>2+</sup>]<sub>ER</sub> scale. Fitted Hill plot curves are also shown. Putative range of Ca<sup>2+</sup> concentration in the ER is indicated (gray box).

(f) Ca<sup>2+</sup> titration of CEPIA2-4<sub>mt</sub> plotted against linear [Ca<sup>2+</sup>]<sub>ER</sub> scale. Fitted Hill plot curves are also shown.

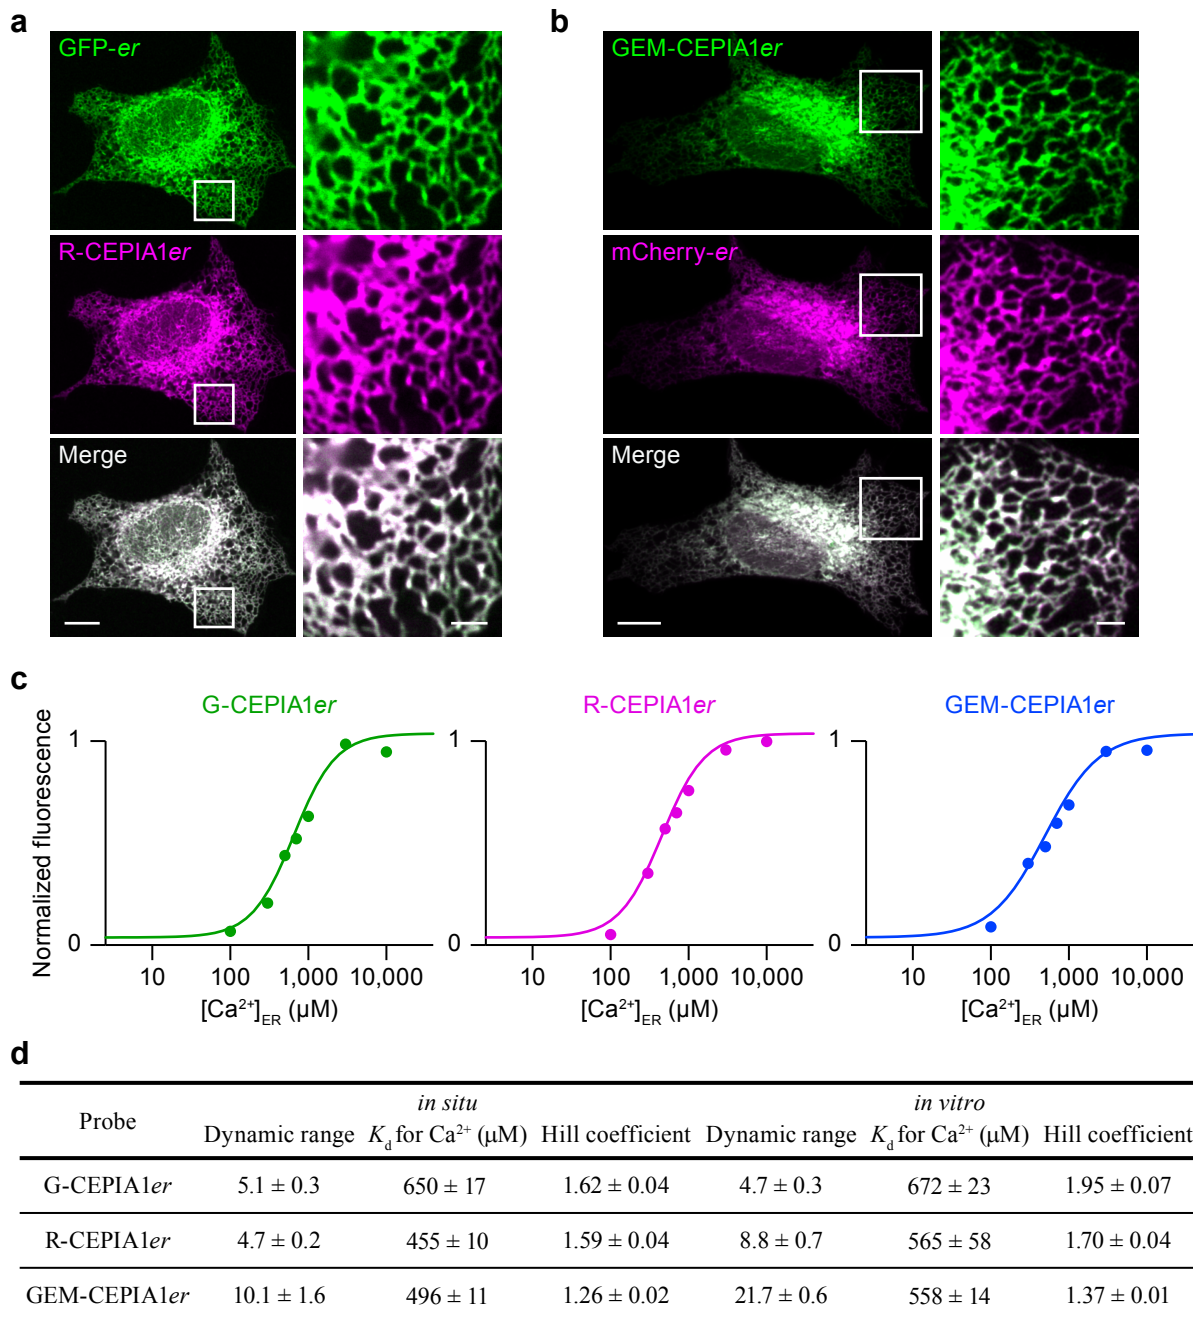

### Supplementary Figure 3. Localization and *in situ* $\text{Ca}^{2+}$ titration of CEPIA $_{er}$ .

(a and b) Representative images of HeLa cells expressing R-CEPIA $_{er}$  (a) or GEM-CEPIA $_{er}$  (b). Images were compared with the co-expressed ER-targeted EGFP (a) or mCherry (b). The images within the white boxes were expanded. Note that the ER signal sequence in CEPIA $_{er}$  is different from that of EGFP-er and mCherry-er (See Methods). Scale bars, 10  $\mu\text{m}$  (left) and 2  $\mu\text{m}$  (right).

(c) To determine the  $\text{Ca}^{2+}$  affinity of CEPIA $_{er}$  within the ER, HeLa cells expressing one of CEPIA $_{er}$  (G-CEPIA $_{er}$ , R-CEPIA $_{er}$  or GEM-CEPIA $_{er}$ ) were permeabilized with 150  $\mu\text{M}$   $\beta$ -escin in a solution containing 3  $\mu\text{M}$  thapsigargin and 3  $\mu\text{M}$  ionomycin. Then  $\text{Ca}^{2+}$  concentration in the bathing solution was increased in a stepwise manner.

(d) Summary of the properties of CEPIA $_{er}$  determined by *in situ*  $\text{Ca}^{2+}$  titration. Note that these parameters were similar to those obtained from *in vitro*  $\text{Ca}^{2+}$  titration experiments.

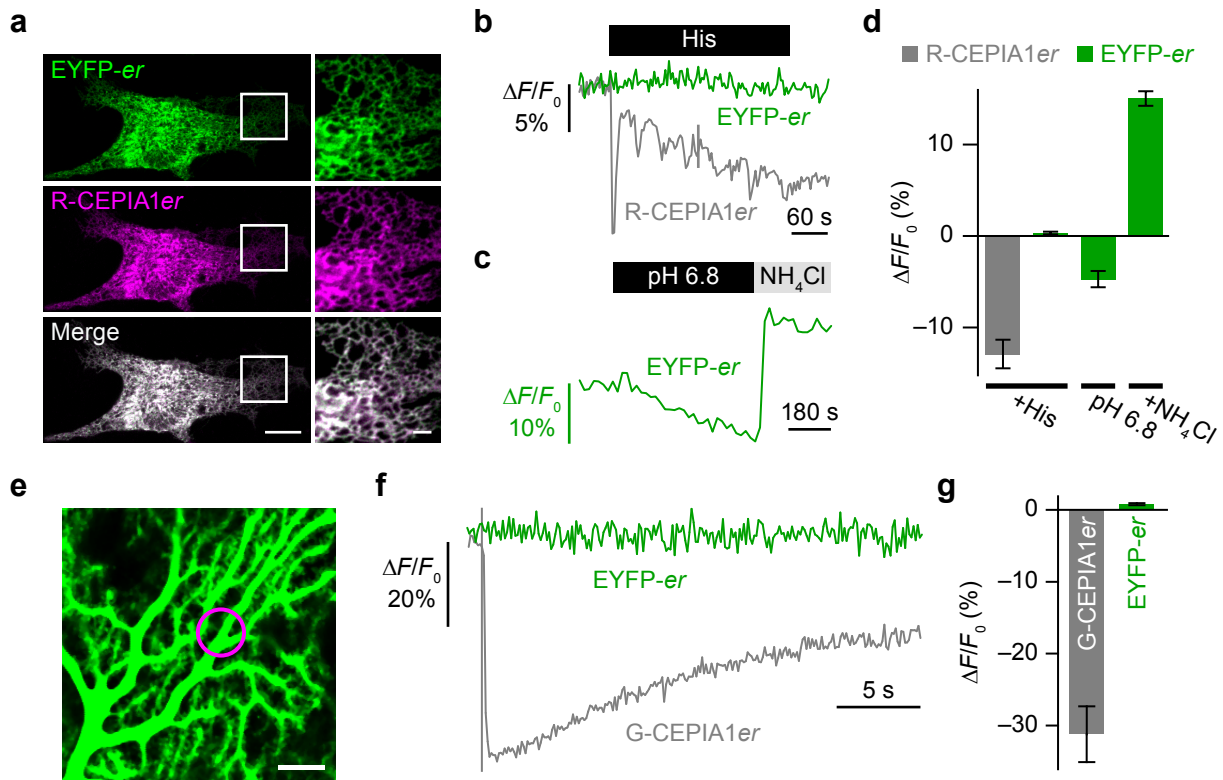

**Supplementary Figure 4. CEPIAer responses are independent of ER pH dynamics.**

(a) Confocal images of HeLa cells expressing EYFP-*er* (upper), R-CEPIA1*er* (middle) and the merged image (lower). The images within the white boxes were expanded. Scale bars, 10  $\mu\text{m}$  (left) and 2  $\mu\text{m}$  (right).

(b) Simultaneous measurement of EYFP-*er* (green) and R-CEPIA1*er* (gray) in HeLa cells stimulated with 10  $\mu\text{M}$  histamine.

(c) pH-dependent changes of EYFP-*er* fluorescence intensity in HeLa cells. The cells were first bathed in an acidic solution (pH 6.8) containing monensin (10  $\mu\text{M}$ ) and nigericin (10  $\mu\text{M}$ ), and subsequently in an alkalization solution (30 mM  $\text{NH}_4\text{Cl}$ ).

(d) Summary of EYFP-*er* and R-CEPIA1*er* responses (mean  $\pm$  s.e.m.,  $n = 14$ ).

(e) Dendrites of EYFP-*er*-expressing Purkinje cells. The magenta circle (10  $\mu\text{m}$  diameter, under the stimulation pipette) indicates the region of interest for panel f. Scale bar, 10  $\mu\text{m}$ .

(f) The time course of fluorescence intensity change of EYFP-*er* (green) upon PF inputs (10 stimuli at 100 Hz, gray line). For comparison, the fluorescence intensity change of G-CEPIA1*er* displayed in Fig. 3 was shown (gray).

(g) Summary of PF-induced responses of G-CEPIA1*er* and EYFP-*er*. Average  $\Delta F/F_0$  within the 3-s time window starting from the first PF stimulation pulse (mean  $\pm$  s.e.m.,  $n = 8$ ).

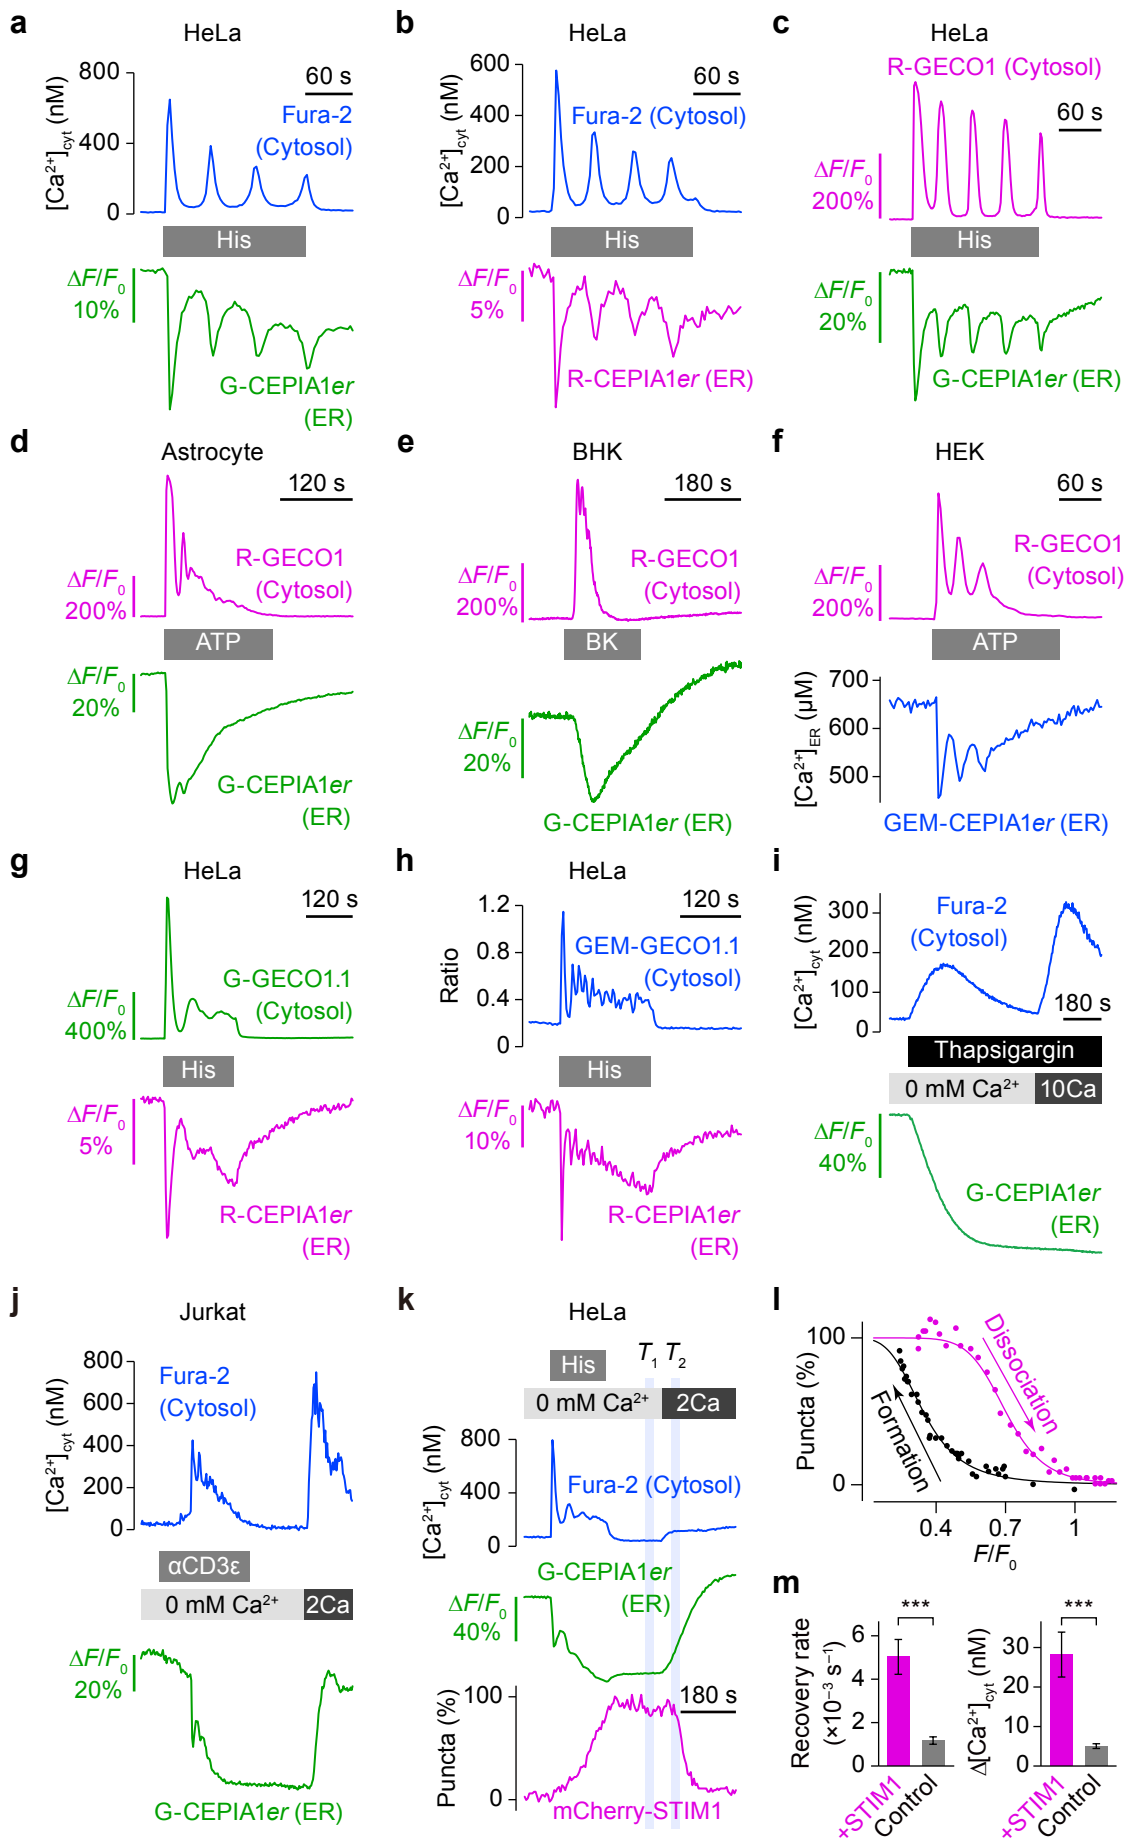

**Supplementary Figure 5. Simultaneous measurement of ER Ca<sup>2+</sup> signals with other fluorescence molecules using CEPIA<sub>1er</sub>.**

**(a and b)** Simultaneous measurement of Ca<sup>2+</sup> signals in the ER (G-CEPIA<sub>1er</sub> or R-CEPIA<sub>1er</sub>) and cytosol (fura-2) in HeLa cells stimulated with 10 μM histamine.

**(c–f)** Simultaneous Ca<sup>2+</sup> imaging in the ER (G-CEPIA<sub>1er</sub> or GEM-CEPIA<sub>1er</sub>) and cytosol (R-GECO1) in a HeLa cell **(c)**, an astrocyte **(d)**, a BHK cell **(e)** or a HEK293A cell **(f)**, stimulated with 10 μM histamine **(c)**, 30 μM ATP **(d and f)** or 100 nM bradykinin **(e)**, respectively.

**(g and h)** Simultaneous Ca<sup>2+</sup> imaging in the ER (R-CEPIA<sub>1er</sub>) and cytosol using G-GECO1.1 **(g)** or GEM-GECO1 **(h)** in HeLa cells stimulated with 10 μM histamine.

**(i)** Time courses of cytosolic (upper panel) and ER (lower panel) Ca<sup>2+</sup> responses to thapsigargin (3 μM) treatment in HeLa cells in the absence of extracellular Ca<sup>2+</sup>, and to subsequent “Ca<sup>2+</sup> add back” in the extracellular solution.

**(j)** Time courses of cytosolic (upper panel) and ER (lower panel) Ca<sup>2+</sup> responses to anti-human CD3ε monoclonal antibody (1 μg/ml, R&D systems) treatment in Jurkat T cells in the absence of extracellular Ca<sup>2+</sup>, and to subsequent “Ca<sup>2+</sup> add back” in the extracellular solution.

**(k)** Simultaneous imaging of STIM1 dynamics, ER Ca<sup>2+</sup> level and cytosolic Ca<sup>2+</sup> concentration using mCherry-STIM1, G-CEPIA<sub>1er</sub> and fura-2, respectively. Time courses of cytosolic Ca<sup>2+</sup> concentration (blue), ER Ca<sup>2+</sup> dynamics (green) and the number of mCherry-STIM1 puncta normalized with the minimum and maximum (magenta). As [Ca<sup>2+</sup>]<sub>ER</sub> was depleted with histamine stimulation in the Ca<sup>2+</sup>-free solution, mCherry-STIM1 formed puncta. After Ca<sup>2+</sup> addback in the external solution, [Ca<sup>2+</sup>]<sub>ER</sub> gradually recovered and mCherry-STIM1 puncta disappeared. We calculated the slope of linear fitting to the G-CEPIA<sub>1er</sub> fluorescence change and the average [Ca<sup>2+</sup>]<sub>cyt</sub> change during the time interval between  $T_1$  to  $T_2$  (shown in **m**).

**(l)** The normalized number of mCherry-STIM1 puncta was plotted against normalized G-CEPIA<sub>1er</sub> fluorescence ( $F/F_0$ ) during puncta formation (black) and dissociation (magenta). The relationship between [Ca<sup>2+</sup>]<sub>ER</sub> and puncta formation can be fitted by Hill plot with a Hill coefficient of  $8.7 \pm 1.1$  and a  $K_{1/2}$  of  $0.37 \pm 1.1$  for puncta formation, and  $6.8 \pm 0.6$  and  $0.60 \pm 0.04$  for puncta dissociation.

**(m)** Comparison of the ER Ca<sup>2+</sup> refilling rate and [Ca<sup>2+</sup>]<sub>cyt</sub> in response to “Ca<sup>2+</sup> add back” between STIM1-expressing cells and control cells. Left, the slope of linear fitting to the G-CEPIA<sub>1er</sub> fluorescence change during the time interval between  $T_1$  to  $T_2$  in **k** (middle panel) were shown. Right, the average [Ca<sup>2+</sup>]<sub>cyt</sub> change during the time interval between  $T_1$  to  $T_2$  in **k** (upper panel) were shown.  $n = 35$  for control and 6 for STIM1-expressing cells (mean  $\pm$  s.e.m.). \*\*\*,  $P < 0.001$ .

**a**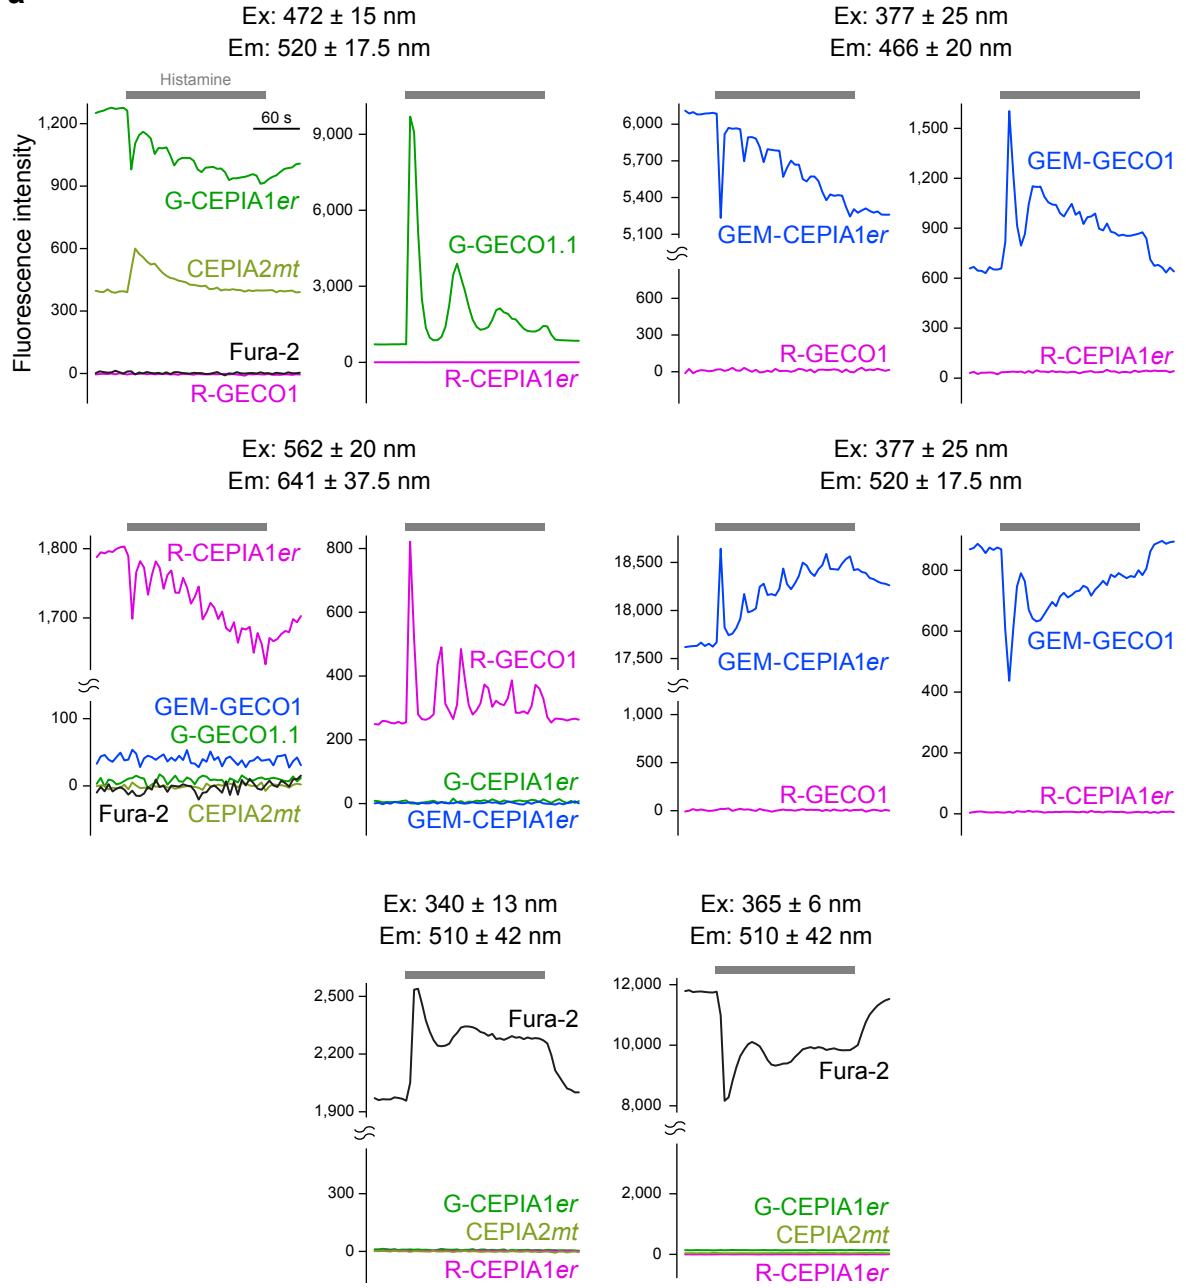**b**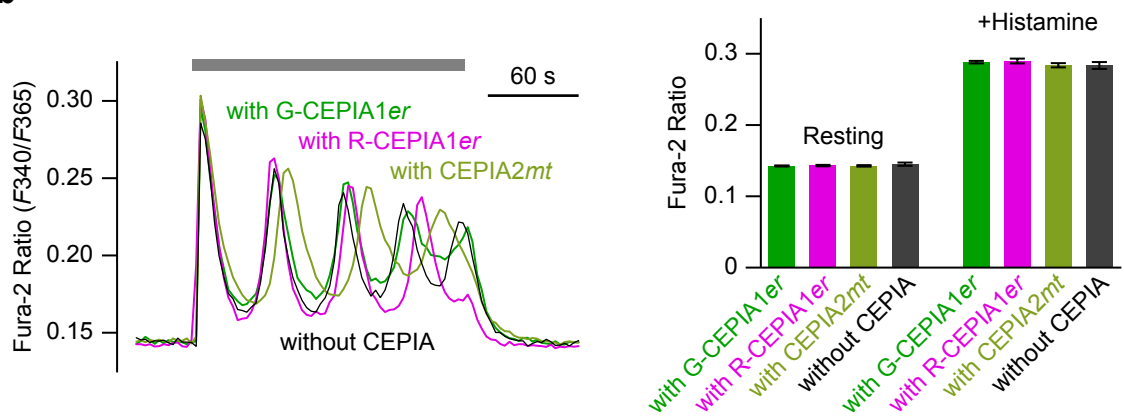



**Supplementary Figure 6. Bleed-through of CEPIA, GECO and fura-2.**

(a) Representative traces of fluorescence intensity changes in response to histamine application at six pairs of excitation and emission wavelengths (472/520, 562/641, 377/466, 377/520, 340/510 and 365/510 nm), in HeLa cells expressing one of the genetically encoded indicators or loaded with fura-2. Autofluorescence was subtracted.

(b) Comparison of the resting and agonist-induced peak fura-2 ratios among the cells expressing G-CEPIA1*er* (green;  $n = 18$ , mean  $\pm$  s.e.m.), R-CEPIA1*er* (magenta;  $n = 25$ ), CEPIA2*mt* (light green;  $n = 16$ ) and cells without CEPIA expression (black;  $n = 68$ ). There were no significant differences in the resting and peak fura-2 ratios.  $P = 0.51$  and  $0.40$ , one-way ANOVA.

**a**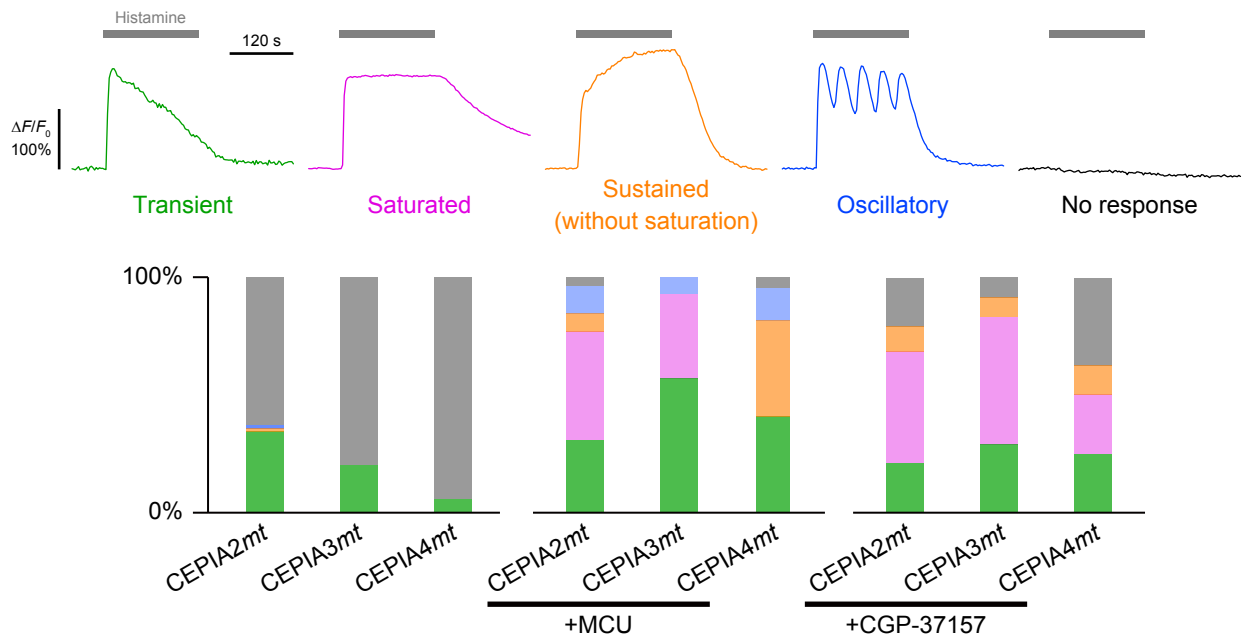**b**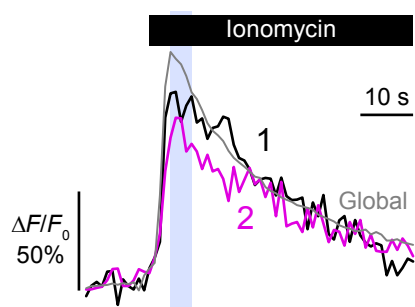**c**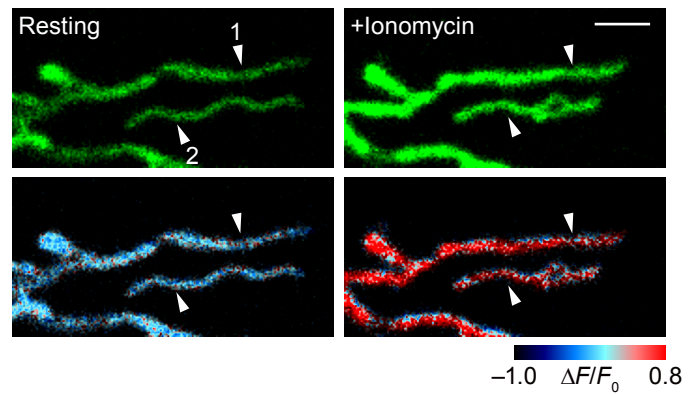**d**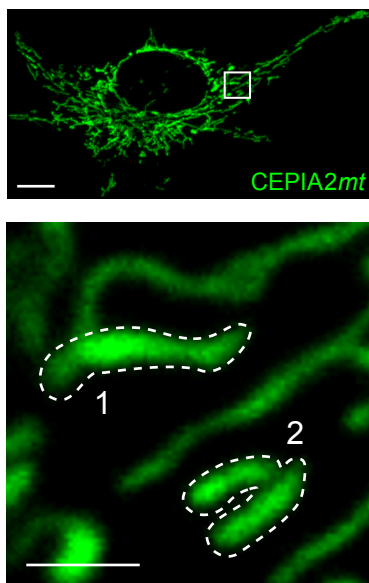**e**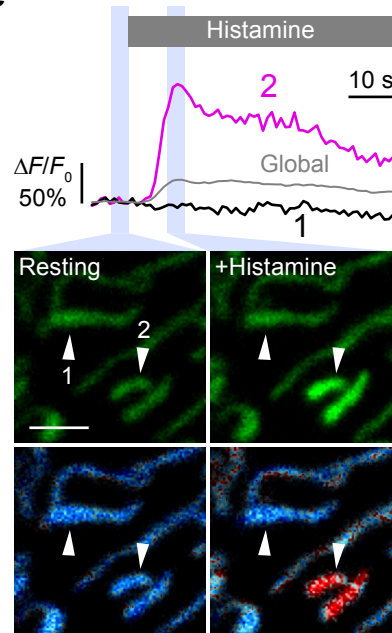**f**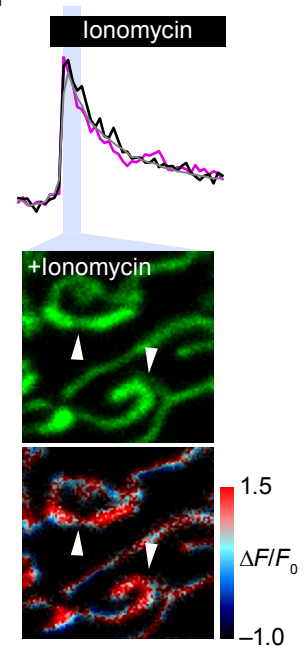

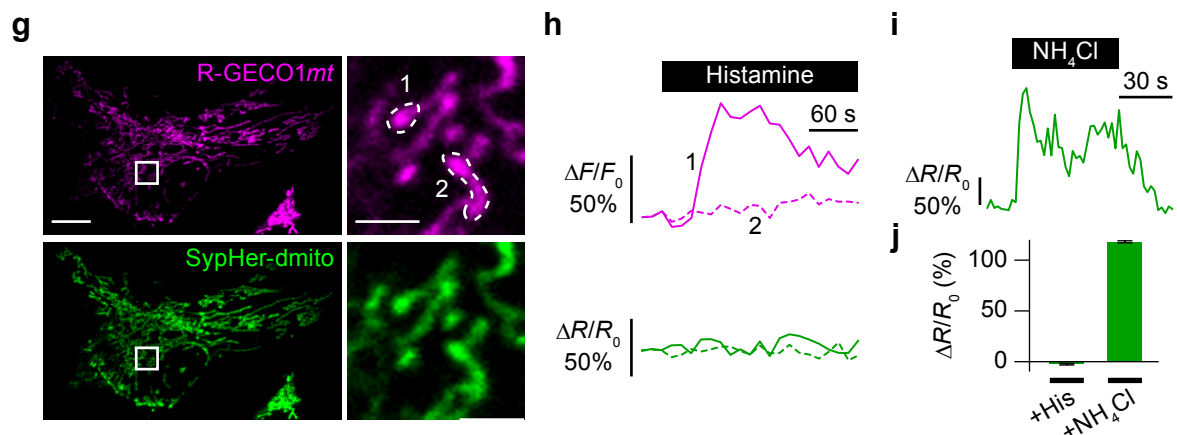

**Supplementary Figure 7. Intercellular and subcellular heterogeneity of mitochondrial  $\text{Ca}^{2+}$  signals.**

(a) Mitochondrial  $\text{Ca}^{2+}$  responses measured with CEPIA2-4mt during histamine (10  $\mu\text{M}$ ) stimulation were compared among control HeLa cells ( $n = 67, 45$  and  $35$ ), rat MCU-expressing cells ( $n = 26, 28$  and  $22$ ) and CGP-37157 (10  $\mu\text{M}$ )-pretreated cells ( $n = 19, 24$  and  $16$ ). The response patterns were classified into five groups: rapid increase followed by slow decay (green), saturated response (magenta), sustained increase without saturation (orange), oscillatory response (blue), and no response (gray).

(b and c) Subcellular imaging of mitochondrial  $\text{Ca}^{2+}$  dynamics upon ionomycin application in a HeLa cell expressing CEPIA3mt. (b) Time courses within the two regions of interest in Fig. 7a and the entire cell (global) were shown. (c) Averaged fluorescence images and pseudo-color images at resting state ( $T_1$  in Fig. 7b) and after ionomycin application (blue box) were shown. Scale bar, 2  $\mu\text{m}$ .

(d) Fluorescence images of a HeLa cell expressing CEPIA2mt. The area within the white box was expanded (lower). Scale bars, 10  $\mu\text{m}$  (upper) and 2  $\mu\text{m}$  (lower).

(e and f) Time courses within the two regions of interest in d and the entire cell (global) were shown upon 10  $\mu\text{M}$  histamine (e) and subsequent 3  $\mu\text{M}$  ionomycin (f) application. Averaged fluorescence images and pseudo-color images were also indicated. Scale bar, 2  $\mu\text{m}$ .

(g) Representative images of HeLa cells expressing R-GECO1mt (upper) and a mitochondria-targeted pH indicator SypHer-dmito (lower). The regions within the white boxes were expanded (right). Scale bars, 10  $\mu\text{m}$  (left) and 2  $\mu\text{m}$  (right).

(h) Time courses of R-GECO1mt (upper) and SypHer-dmito (lower) upon histamine (10  $\mu\text{M}$ ) stimulation within the two regions of interest indicated in g.

(i) pH dependent change of SypHer-dmito fluorescence ratio in the region 1 indicated in g. The cells expressing SypHer-dmito were alkalinized with a solution containing 30 mM  $\text{NH}_4\text{Cl}$ .

(j) Summary of SypHer-dmito responses. Mitochondria responding with an increase in  $\text{Ca}^{2+}$  to histamine stimulation were analyzed. The average of  $\Delta R/R_0$  after histamine and  $\text{NH}_4\text{Cl}$  stimulation were plotted ( $n = 89$  and  $365$ , respectively; mean  $\pm$  s.e.m.).

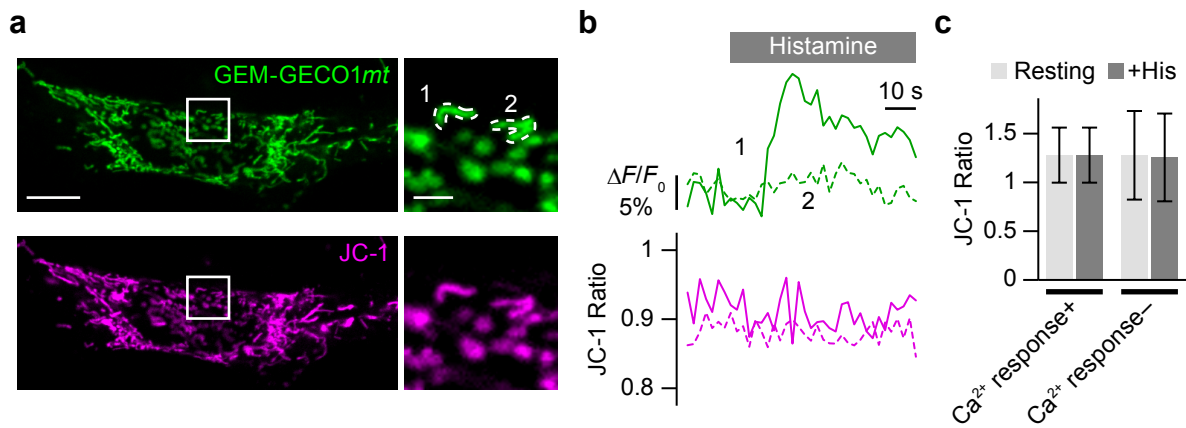

**Supplementary Figure 8. Simultaneous imaging of mitochondrial inner membrane potential with heterogeneous Ca<sup>2+</sup> signal.**

(a) Representative images of HeLa cells expressing GEM-GECO1mt (upper) co-stained with JC-1 (lower). The regions within the white boxes were expanded (right). Scale bars, 10  $\mu$ m (left) and 2  $\mu$ m (right).

(b) Time courses of GEM-GECO1mt (upper) and JC-1 (lower) upon histamine (10  $\mu$ M) stimulation within the two regions of interest indicated in a.

(c) Summary of JC-1 ratio in the mitochondria responding with ( $n = 69$ , mean  $\pm$  s.d.) or without ( $n = 327$ ) an increase in Ca<sup>2+</sup> concentration to histamine stimulation. The average values within 6-s time window before (gray, Resting) and after (black, +His) histamine application were analyzed.

**Supplementary Table 1. CEPIA library.**

**cfGCaMP2 variants**

| Mutated amino acids                                                              | Dynamic range | Hill coeff. | $K_d$ ( $\mu$ M) |
|----------------------------------------------------------------------------------|---------------|-------------|------------------|
| <b>Original (CEPIA2<i>mt</i>)</b>                                                | <b>5.1</b>    | <b>2.5</b>  | <b>0.67</b>      |
| <b>■ Substitutions used in previously reported ER Ca<sup>2+</sup> indicators</b> |               |             |                  |
| E11K/E84R/E87K (D1ER)                                                            | 2.6           | 0.9         | 14.5             |
| E31Q (YC4er)                                                                     | 2.5           | 0.5         | 64.9             |
| E104Q (YC3er)                                                                    | 3.4           | 3.7         | 1.2              |
| <b>■ Single substitution at -Z position</b>                                      |               |             |                  |
| <b>E31D (split-YC7.3er, CEPIA3<i>mt</i>)</b>                                     | <b>5.0</b>    | <b>1.5</b>  | <b>14.5</b>      |
| E67D                                                                             | 4.7           | 1.4         | 9.2              |
| E104D                                                                            | 3.8           | 4.2         | 0.99             |
| E140D                                                                            | 4.4           | 3.7         | 2.1              |
| <b>■ Double substitutions at -Z positions</b>                                    |               |             |                  |
| E31D/E67D                                                                        | 2.6           | 1.3         | 470              |
| E31D/E104D                                                                       | 4.1           | 1.5         | 20.7             |
| E31D/E140D                                                                       | 4.7           | 2.0         | 23.5             |
| E67D/E104D                                                                       | 4.3           | 1.5         | 17.9             |
| E67D/E140D                                                                       | 4.7           | 2.1         | 23.9             |
| E104D/E140D                                                                      | 4.2           | 1.2         | 24.4             |
| <b>■ Triple substitutions at -Z positions</b>                                    |               |             |                  |
| E31D/E104D/E140D                                                                 | 3.2           | 1.9         | 135              |
| E67D/E104D/E140D                                                                 | 3.6           | 2.2         | 129              |
| <b>■ Substitutions at F92W and/or D133E</b>                                      |               |             |                  |
| F92W                                                                             | 4.5           | 3.3         | 0.90             |
| D133E                                                                            | 4.3           | 4.7         | 2.1              |
| F92W/D133E                                                                       | 4.6           | 3.0         | 10.3             |
| <b>■ F92W/D133E and single substitutions at -Z positions</b>                     |               |             |                  |
| <b>E31D/F92W/D133E (CEPIA4<i>mt</i>)</b>                                         | <b>4.9</b>    | <b>1.7</b>  | <b>90.2</b>      |
| E67D/F92W/D133E                                                                  | 4.9           | 2.3         | 75.2             |
| F92W/E104D/D133E                                                                 | 3.5           | 1.3         | 130              |
| F92W/D133E/E140D                                                                 | 4.5           | 0.9         | 67.4             |
| <b>■ F92W/D133E and double substitutions at -Z positions</b>                     |               |             |                  |
| <b>E31D/F92W/E104D/D133E (CEPIA1er)</b>                                          | <b>4.2</b>    | <b>1.3</b>  | <b>368</b>       |
| E31D/F92W/D133E/E140D                                                            | 3.5           | 1.8         | 411              |
| E67D/F92W/D104D/D133E                                                            | 4.1           | 1.9         | 344              |
| E67D/F92W/D133E/D140D                                                            | 4.4           | 1.7         | 276              |
| F92W/E104D/D133E/E140D*                                                          | 1.3, 2.7      | 1.9, 1.4    | 3.7, 1,540       |
| <b>■ D133E and single substitutions at -Z positions</b>                          |               |             |                  |
| E31D/D133E                                                                       | 5.0           | 2.2         | 33.2             |
| E67D/D133E                                                                       | 5.0           | 2.4         | 31.1             |
| E104D/D133E                                                                      | 3.5           | 1.2         | 43.8             |
| D133E/E140D                                                                      | 4.5           | 2.2         | 8.2              |
| <b>■ D133E and double substitutions at -Z positions</b>                          |               |             |                  |
| E31D/E104D/D133E                                                                 | 4.2           | 2.0         | 201              |
| E31D/D133E/E140D                                                                 | 4.7           | 1.8         | 92.2             |
| E67D/E104D/D133E                                                                 | 4.1           | 2.2         | 154              |
| E67D/D133E/E140D                                                                 | 4.4           | 1.9         | 93.4             |
| E104D/D133E/E140D*                                                               | 1.3, 3.1      | 1.7, 1.3    | 4.8, 661         |
| <b>■ Other substitutions</b>                                                     |               |             |                  |
| E11K                                                                             | 2.1           | 3.6         | 1.4              |
| E84R/E87K                                                                        | 3.3           | 2.8         | 1.2              |
| E31A                                                                             | 1.9           | 0.8         | 15.2             |
| E31Q/D133E                                                                       | 2.2           | 0.6         | 109              |
| E67D/E104Q                                                                       | 4.2           | 1.4         | 43.7             |
| E104Q/E140D                                                                      | 3.1           | 0.8         | 23.8             |
| E31Q/F92W/D133E                                                                  | 2.1           | 0.3         | 1,730            |
| F92W/E104Q/D133E*                                                                | 1.5, 1.4      | 2.0, 0.9    | 4.3, 6,100       |
| E31D/F92W/E104Q/D133E                                                            | 1.8           | 0.6         | 13,400           |
| E67D/F92W/E104Q/D133E                                                            | 2.4           | 0.7         | 2,330            |
| F92W/S101D/D133E                                                                 | 5.1           | 3.2         | 7.0              |
| F92W/D95N/N97D/D133E                                                             | 4.9           | 3.2         | 8.2              |
| F92W/D95N/S101D/D133E                                                            | 4.3           | 2.7         | 11.1             |
| E31D/L36M                                                                        | 4.0           | 1.1         | 22.4             |
| E31D/L36M/E67D                                                                   | 2.8           | 1.2         | 873              |
| E31D/L36M/E104D                                                                  | 4.0           | 1.5         | 25.0             |
| E31D/L36M/E140D                                                                  | 4.9           | 2.0         | 26.1             |
| E31D/L36M/E104Q                                                                  | 3.8           | 1.5         | 45.2             |
| T26G/E31D/L36M                                                                   | 4.6           | 0.9         | 2.4              |
| E31D/L36M/Q41L                                                                   | 3.9           | 1.3         | 15.1             |
| E31D/L36M/K75I                                                                   | 3.7           | 1.2         | 9.2              |
| E31D/L36M/Q41L/K75I                                                              | 3.1           | 1.1         | 8.9              |

**R-GECO1 variants with cfGCaMP2 CaM**

| Mutated amino acids                            | Dynamic range | Hill coeff. | $K_d$ ( $\mu$ M) |
|------------------------------------------------|---------------|-------------|------------------|
| E31D/E67D                                      | 17.6          | 1.2         | 152              |
| E31D/F92W/D133E                                | 21.9          | 2.3         | 16.6             |
| E31D/E104D/D133E                               | 19.8          | 2.7         | 26.3             |
| E104D/D133E/E140D                              | 12.5          | 1.4         | 50.8             |
| E31D/E67D/F92W/D133E                           | 17.2          | 1.2         | 211              |
| E31D/F92W/E104D/D133E                          | 16.9          | 2.3         | 70.9             |
| E67D/F92W/D133E/E140D                          | 17.6          | 2.1         | 20.0             |
| F92W/E104D/D133E/E140D                         | 14.9          | 1.0         | 123              |
| <b>E31D/E67D/F92W/E104D/D133E (R-CEPIA1er)</b> | <b>8.8</b>    | <b>1.7</b>  | <b>565</b>       |

**G-GECO1.1 variants with cfGCaMP2 CaM**

| Mutated amino acids                       | Dynamic range | Hill coeff. | $K_d$ ( $\mu$ M) |
|-------------------------------------------|---------------|-------------|------------------|
| E31D/F92W/D133E                           | 10.2          | 1.5         | 209              |
| <b>E31D/F92W/E104D/D133E (G-CEPIA1er)</b> | <b>4.7</b>    | <b>1.9</b>  | <b>672</b>       |
| E31D/E67D/F92W/E104D/D133E                | 3.8           | 0.5         | 3,860            |

**GEM-GECO1 variants with cfGCaMP2 CaM**

| Mutated amino acids        | Dynamic range | Hill coeff. | $K_d$ ( $\mu$ M) |
|----------------------------|---------------|-------------|------------------|
| E31D/F92W/E104D/D133E      | 1.1           | n.d.        | n.d.             |
| E31D/E67D/F92W/E104D/D133E | 1.2           | n.d.        | n.d.             |

**GEM-GECO1 variants with original CaM**

| Mutated amino acids                         | Dynamic range | Hill coeff. | $K_d$ ( $\mu$ M) |
|---------------------------------------------|---------------|-------------|------------------|
| Original                                    | 67.5          | 2.6         | 0.31             |
| E31D                                        | 23.7          | 1.2         | 7.2              |
| E31D/E67D                                   | 13.0          | 1.2         | 97.1             |
| E31D/D133E                                  | 41.3          | 2.4         | 36.4             |
| E31D/E140D                                  | 43.6          | 2.2         | 24.2             |
| E31D/F92W/D133E                             | 11.2          | 1.9         | 90.0             |
| E31D/E104D/D133E                            | 20.8          | 1.7         | 89.7             |
| E31D/D133E/E140D                            | 24.8          | 1.6         | 147              |
| E31D/F92W/E104D/D133E                       | 8.1           | 2.1         | 225              |
| <b>E31D/F92W/D133E/E140D (GEM-CEPIA1er)</b> | <b>21.7</b>   | <b>1.4</b>  | <b>558</b>       |
| E31D/E104D/D133E/E140D                      | 34.8          | 1.5         | 483              |
| E31D/E67D/F92W/D133E/E140D                  | 1.4           | 1.1         | 602              |
| E31D/F92W/E104D/D133E/E140D                 | 2.3           | 1.0         | 2,010            |

CEPIA library generated in the present study. The properties of CEPIA variants that were used in the intraorganellar Ca<sup>2+</sup> imaging are highlighted (magenta). cDNAs were confirmed by sequencing.

\*Ca<sup>2+</sup> titration curves were obtained by fitting with a double Hill plot equation.

**Supplementary Table 2. The list of primers and oligonucleotides.**

| Primer number  | Sequence                                     |
|----------------|----------------------------------------------|
| 1              | ATAAGCATATGCAGGTCCAACCTGCAGGGAT              |
| 2              | ATTAGATCTCTACAGCTCGTCCTTCTCGCT               |
| 3              | AGAGGATCCATGGTCGACTCTTCACGTCGT               |
| 4              | TAGCGGCCGCCTTCGCTGTCATCATTTGTA               |
| 5              | GAGACCAACTGACTGAAGAGCAGATCGCAG               |
| 6              | GAGTAGCCTCCCAGCCCATGGTCTTCTTCT               |
| 7              | GCAACACTCGAGACCAACTGACTGAAGAGC               |
| 8 (E11K)       | GCTGACTGAAGAGCAGATCGAAAATTTAA                |
| 9 (E11K)       | TGGTCACGCGTGTGTACTCCAGCTT                    |
| 10 (E31D)      | GGGCAGAACCCACAGAAGCAGAGCTCCAG                |
| 11 (E31D)      | CAGAGACCGCAGCACCGTCCCAGATCCTT                |
| 12 (E31D)      | CAGAGACCGCATCACCGTCCCAGATCCTT                |
| 13 (E31Q)      | CTGGGGACGGTGCTGCGGTCTCT                      |
| 14 (E31Q)      | CTGCTTGGTTGTTATTGTCCCATCCCCGTC               |
| 15 (E67D)      | GACAATGATGGCAAGAAAAATGAAAGACAC               |
| 16 (E67D)      | GACGATGATGGCAAGAAAAATGAATGACAC               |
| 17 (E67D)      | GACAATGATGGCACCTAAAATGCAGGACAC               |
| 18 (E67D)      | AGGAAATCAGGGAAGTCGATTGTGCCATTA               |
| 19 (E67D)      | AGGAAATCAGGGAAGTCGAAGGTACCGTCA               |
| 20 (E67D)      | AGGAAATCAGGGAAGTCGATGGTACCGTCA               |
| 21 (E84R/E87K) | AATTCGAAAAGCGTTCGGTGTGTTTGATAA               |
| 22 (E84R/E87K) | CTTTCTTCACTGTCTGTGTCTTTCATTTTT               |
| 23 (F92W)      | GGGATAAGGATGGCAATGGCTACATCAGT                |
| 24 (F92W)      | ACACACGGAACGCTTCGCGAATTTCTTCT                |
| 25 (F92W)      | GGGATAAGGATGGCAATGGCTACATCGGC                |
| 26 (E104D)     | AGCAGACCTTCGCCACGTGATGACAAAACCT              |
| 27 (E104D)     | AGCAGATCTTCGCCACGTGATGACAAAACCT              |
| 28 (E104D)     | AGCAGATCTTCGCCACGTGATGACAGACCT               |
| 29 (E104D)     | GCGCCGATGTAGCCATTGCCGTCTTATC                 |
| 30 (E104Q)     | GCAGAGATGTAGCCATTGCCATCCTTATC                |
| 31 (E104Q)     | AGCACAGCTTCGCCACGTGATGACAAAACCT              |
| 32 (D133E)     | ATCGATGGAGAAGGTCAGGTAAACTACGAA               |
| 33 (D133E)     | ATCTGCTTCCCTGATCATTTCATCAACCTC               |
| 34 (D133E)     | GTCTGCTACCCTGATCATTTCATCAACCTC               |
| 35 (E140D)     | ATGATGACAGCGAAGGCGGCCGAGAACAA                |
| 36 (E140D)     | TTGTACAAAGTCTTCGTAGTTTACCTGACC               |
| 37             | AGGGATCCATGCGGGGTTCTCATCATCATC               |
| 38             | GGGATCCATCATCATCATCG                         |
| 39             | TCGACGATGATGATGGATCCCTGCA                    |
| 40             | CGCGCCAAAATTCATTCCTACTGGGGGACCCC             |
| 41             | ATGAGCGTGCTCACCCCACTCCTGCTGCGGGGGCTGACCG     |
| 42             | GCAGCGCTAGGCGGCTGCCAGTCCCAGCGG               |
| 43             | GCCAAGATCCACAGTCTCGGCGATCCC                  |
| 44             | TCATGGGGTCCCCAGTGAATGAATTTGG                 |
| 45             | CTGCCGGTCAGCCCCGCAGCAGGAGTGGGGTGAGCACGC      |
| 46             | TGGCCCGCGGACTGGCAGCCGCTAGCG                  |
| 47             | GATCCGGGATCGCCGAGACTGTGGATCT                 |
| 48             | ATAAGCTTGCCACCATGGGATGGAGCTGTA               |
| 49             | AGAACTAGTCTACAGCTCGTCCTTCTCGCT               |
| 50             | GATCCATGCTGCTGCCCCGTCCCCCTGCTGC              |
| 51             | TGGCCTGCTGGGCGCCGCCGACATGG                   |
| 52             | CCCAGCAGCAGGGGACGGGAGCAGCATG                 |
| 53             | TCGACCATGTCGGCGCGGCCAGCAGG                   |
| 54             | AAACCGCGGACATGGTGAGCAAGGGCGAGG               |
| 55             | GACGAATTCTTACAGCTCGTCCTTCTTGTACAGCTCGTCCATGC |
| 56             | AAGCCGCGGACATGGTGAGCAAGGGCGAGG               |
| 57             | GCCGAATTCTTACAGCTCGTCCTTCTTGTACAGCTCGTCCATGC |
| 58             | CCGGGCGAATTCGGCAGATATCCATCACAC               |
| 59             | GATGATGATGGGATCCTCTCATGTCCGCGG               |
| 60             | CTCGGATCCATGGTGAGCAAGGGCGAGGAG               |
| 61             | TTAATGCGGCCGCGCCGAGAGTGATCCCGG               |
| 62             | TGTCTGACGGCTACAACAGCGACAACGCTT               |
| 63             | TTGCTGATCGCGCAAAGAGTGACCATCTT                |
| 64             | ATATCTAGAGCCACCATGGATGTGTGCGCC               |
| 65             | CGCCTTAGACTACTTCTTAAGAGGCTTCT                |
| 66             | CTTGTACAGCTCGTCCATGCCCGGTTGA                 |

The primers and oligonucleotides used in the present study were listed. For the primers used for site-directed mutagenesis, the target mutation sites are indicated in parentheses.
